# Supplementary material
Source: publisher figshare collection journal article supplement (https://acs.figshare.com/ndownloader/files/5141038)
Supplement: Supplementary file 1 [file 5141038]

  
data_pbca 
  
_audit_creation_method            SHELXL-97 
_chemical_name_systematic 
; 
 ? 
; 
_chemical_name_common             ? 
_chemical_melting_point           ? 
_chemical_formula_moiety          ? 
_chemical_formula_sum 
 'C23 H8 Al F15 O2' 
_chemical_formula_weight          628.27 
  
loop_ 
 _atom_type_symbol 
 _atom_type_description 
 _atom_type_scat_dispersion_real 
 _atom_type_scat_dispersion_imag 
 _atom_type_scat_source 
 'C'  'C'   0.0033   0.0016 
 'International Tables Vol C Tables 4.2.6.8 and 6.1.1.4' 
 'H'  'H'   0.0000   0.0000 
 'International Tables Vol C Tables 4.2.6.8 and 6.1.1.4' 
 'O'  'O'   0.0106   0.0060 
 'International Tables Vol C Tables 4.2.6.8 and 6.1.1.4' 
 'F'  'F'   0.0171   0.0103 
 'International Tables Vol C Tables 4.2.6.8 and 6.1.1.4' 
 'Al'  'Al'   0.0645   0.0514 
 'International Tables Vol C Tables 4.2.6.8 and 6.1.1.4' 
  
_symmetry_cell_setting            Orthorhombic 
_symmetry_space_group_name_H-M    Pbca 
  
loop_ 
 _symmetry_equiv_pos_as_xyz 
 'x, y, z' 
 '-x+1/2, -y, z+1/2' 
 '-x, y+1/2, -z+1/2' 
 'x+1/2, -y+1/2, -z' 
 '-x, -y, -z' 
 'x-1/2, y, -z-1/2' 
 'x, -y-1/2, z-1/2' 
 '-x-1/2, y-1/2, z' 
  
_cell_length_a                    18.284(14) 
_cell_length_b                    12.623(10) 
_cell_length_c                    20.466(16) 
_cell_angle_alpha                 90.00 
_cell_angle_beta                  90.00 
_cell_angle_gamma                 90.00 
_cell_volume                      4723(6) 
_cell_formula_units_Z             8 
_cell_measurement_temperature     173(2) 
_cell_measurement_reflns_used     ? 
_cell_measurement_theta_min       ? 
_cell_measurement_theta_max       ? 
  
_exptl_crystal_description        plate 
_exptl_crystal_colour             'clear color' 
_exptl_crystal_size_max           0.30 
_exptl_crystal_size_mid           0.20
_exptl_crystal_size_min           0.10 
_exptl_crystal_density_meas       ? 
_exptl_crystal_density_diffrn     1.767 
_exptl_crystal_density_method     'not measured' 
_exptl_crystal_F_000              2480 
_exptl_absorpt_coefficient_mu     0.226 
_exptl_absorpt_correction_type    none 
_exptl_absorpt_correction_T_min   ? 
_exptl_absorpt_correction_T_max   ? 
_exptl_absorpt_process_details    ? 
  
_exptl_special_details 
; 
 ? 
; 
  
_diffrn_ambient_temperature       173(2) 
_diffrn_radiation_wavelength      0.71073 
_diffrn_radiation_type            MoK\a 
_diffrn_radiation_source          'fine-focus sealed tube' 
_diffrn_radiation_monochromator   graphite 
_diffrn_measurement_device_type   'CCD area detector' 
_diffrn_measurement_method        'phi and omega scans' 
_diffrn_detector_area_resol_mean  ? 
_diffrn_standards_number          ? 
_diffrn_standards_interval_count  ? 
_diffrn_standards_interval_time   ? 
_diffrn_standards_decay_%         ? 
_diffrn_reflns_number             20837 
_diffrn_reflns_av_R_equivalents   0.0809 
_diffrn_reflns_av_sigmaI/netI     0.0678 
_diffrn_reflns_limit_h_min        -20 
_diffrn_reflns_limit_h_max        17 
_diffrn_reflns_limit_k_min        -14 
_diffrn_reflns_limit_k_max        13 
_diffrn_reflns_limit_l_min        -22 
_diffrn_reflns_limit_l_max        22 
_diffrn_reflns_theta_min          1.99 
_diffrn_reflns_theta_max          23.33 
_reflns_number_total              3416 
_reflns_number_gt                 2114 
_reflns_threshold_expression      >2sigma(I) 
  
_computing_data_collection        'Bruker SMART' 
_computing_cell_refinement        'Bruker SMART' 
_computing_data_reduction         'Bruker SHELXTL' 
_computing_structure_solution     'SHELXS-97 (Sheldrick, 1990)' 
_computing_structure_refinement   'SHELXL-97 (Sheldrick, 1997)' 
_computing_molecular_graphics     'Bruker SHELXTL' 
_computing_publication_material   'Bruker SHELXTL' 
  
_refine_special_details 
; 
 Refinement of F^2^ against ALL reflections.  The weighted R-factor wR and 
 goodness of fit S are based on F^2^, conventional R-factors R are based 
 on F, with F set to zero for negative F^2^. The threshold expression of 
 F^2^ > 2sigma(F^2^) is used only for calculating R-factors(gt) etc. and is 
 not relevant to the choice of reflections for refinement.  R-factors based 
 on F^2^ are statistically about twice as large as those based on F, and R- 
 factors based on ALL data will be even larger. 
; 
  
_refine_ls_structure_factor_coef  Fsqd 
_refine_ls_matrix_type            full 
_refine_ls_weighting_scheme       calc 
_refine_ls_weighting_details 
 'calc w=1/[\s^2^(Fo^2^)+(0.0764P)^2^+0.0000P] where P=(Fo^2^+2Fc^2^)/3' 
_atom_sites_solution_primary      direct 
_atom_sites_solution_secondary    difmap 
_atom_sites_solution_hydrogens    geom 
_refine_ls_hydrogen_treatment     mixed 
_refine_ls_extinction_method      none 
_refine_ls_extinction_coef        ? 
_refine_ls_number_reflns          3416 
_refine_ls_number_parameters      370 
_refine_ls_number_restraints      0 
_refine_ls_R_factor_all           0.0636 
_refine_ls_R_factor_gt            0.0344 
_refine_ls_wR_factor_ref          0.0908 
_refine_ls_wR_factor_gt           0.0812 
_refine_ls_goodness_of_fit_ref    0.632 
_refine_ls_restrained_S_all       0.632 
_refine_ls_shift/su_max           0.044 
_refine_ls_shift/su_mean          0.003 
  
loop_ 
 _atom_site_label 
 _atom_site_type_symbol 
 _atom_site_fract_x 
 _atom_site_fract_y 
 _atom_site_fract_z 
 _atom_site_U_iso_or_equiv 
 _atom_site_adp_type 
 _atom_site_occupancy 
 _atom_site_symmetry_multiplicity 
 _atom_site_calc_flag 
 _atom_site_refinement_flags 
 _atom_site_disorder_assembly 
 _atom_site_disorder_group 
Al1 Al 0.05825(4) 0.95927(7) 0.17026(4) 0.0360(2) Uani 1 1 d . . . 
O1 O 0.12718(10) 0.88745(16) 0.12468(9) 0.0429(5) Uani 1 1 d . . . 
O2 O 0.16856(11) 0.80256(18) 0.03835(11) 0.0580(6) Uani 1 1 d . . . 
C1 C 0.09600(15) 0.9868(2) 0.25969(13) 0.0359(7) Uani 1 1 d . . . 
C2 C 0.16677(16) 0.9788(2) 0.28176(14) 0.0407(7) Uani 1 1 d . . . 
C3 C 0.18857(16) 1.0098(2) 0.34379(15) 0.0436(8) Uani 1 1 d . . . 
C4 C 0.13798(17) 1.0509(2) 0.38544(14) 0.0422(7) Uani 1 1 d . . . 
C5 C 0.06716(16) 1.0635(2) 0.36574(13) 0.0386(7) Uani 1 1 d . . . 
C6 C 0.04821(14) 1.0315(2) 0.30436(13) 0.0352(7) Uani 1 1 d . . . 
C7 C 0.04620(15) 1.1001(2) 0.12795(12) 0.0342(7) Uani 1 1 d . . . 
C8 C 0.10712(16) 1.1587(2) 0.11108(13) 0.0404(7) Uani 1 1 d . . . 
C9 C 0.10498(17) 1.2600(3) 0.08676(13) 0.0434(8) Uani 1 1 d . . . 
C10 C 0.0382(2) 1.3061(2) 0.07704(14) 0.0467(8) Uani 1 1 d . . . 
C11 C -0.02503(17) 1.2527(2) 0.09305(14) 0.0423(7) Uani 1 1 d . . . 
C12 C -0.01896(15) 1.1520(2) 0.11813(13) 0.0376(7) Uani 1 1 d . . . 
C13 C -0.03257(15) 0.8732(2) 0.16248(13) 0.0365(7) Uani 1 1 d . . . 
C14 C -0.07009(15) 0.8701(2) 0.10365(13) 0.0366(7) Uani 1 1 d . . . 
C15 C -0.13925(16) 0.8309(2) 0.09607(13) 0.0384(7) Uani 1 1 d . . . 
C16 C -0.17511(15) 0.7898(2) 0.14942(14) 0.0387(7) Uani 1 1 d . . . 
C17 C -0.14012(16) 0.7878(2) 0.20862(14) 0.0386(7) Uani 1 1 d . . . 
C18 C -0.07079(16) 0.8278(2) 0.21356(13) 0.0375(7) Uani 1 1 d . . . 
C19 C 0.14719(15) 0.8020(3) 0.09891(15) 0.0433(8) Uani 1 1 d . . . 
C20 C 0.1684(2) 0.9024(3) 0.00370(17) 0.0777(12) Uani 1 1 d . . . 
H20A H 0.1853 0.8912 -0.0412 0.117 Uiso 1 1 calc R . . 
H20B H 0.2010 0.9524 0.0258 0.117 Uiso 1 1 calc R . . 
H20C H 0.1186 0.9312 0.0030 0.117 Uiso 1 1 calc R . . 
C21 C 0.15079(16) 0.7002(3) 0.1315(2) 0.0536(9) Uani 1 1 d . . . 
C22 C 0.14849(18) 0.7002(3) 0.1964(2) 0.0773(12) Uani 1 1 d . . . 
H22A H 0.1446 0.7652 0.2195 0.093 Uiso 1 1 calc R . . 
H22B H 0.1507 0.6351 0.2197 0.093 Uiso 1 1 calc R . . 
C23 C 0.16024(19) 0.6049(3) 0.0900(2) 0.0923(14) Uani 1 1 d . . . 
H23A H 0.1617 0.5416 0.1177 0.138 Uiso 1 1 calc R . . 
H23B H 0.2061 0.6106 0.0655 0.138 Uiso 1 1 calc R . . 
H23C H 0.1192 0.5994 0.0594 0.138 Uiso 1 1 calc R . . 
F2 F 0.21953(9) 0.93978(14) 0.24233(8) 0.0577(5) Uani 1 1 d . . . 
F3 F 0.25892(10) 1.00111(15) 0.36243(9) 0.0693(6) Uani 1 1 d . . . 
F4 F 0.15857(10) 1.08185(14) 0.44581(8) 0.0634(5) Uani 1 1 d . . . 
F5 F 0.01816(9) 1.10993(13) 0.40607(8) 0.0553(5) Uani 1 1 d . . . 
F6 F -0.02237(8) 1.04764(13) 0.28550(8) 0.0526(5) Uani 1 1 d . . . 
F8 F 0.17444(9) 1.11609(13) 0.12029(8) 0.0525(5) Uani 1 1 d . . . 
F9 F 0.16660(10) 1.31453(14) 0.07405(9) 0.0643(5) Uani 1 1 d . . . 
F10 F 0.03335(11) 1.40605(14) 0.05423(9) 0.0670(5) Uani 1 1 d . . . 
F11 F -0.09061(10) 1.29904(14) 0.08535(9) 0.0643(5) Uani 1 1 d . . . 
F12 F -0.08303(8) 1.10406(13) 0.13531(8) 0.0519(5) Uani 1 1 d . . . 
F14 F -0.03710(9) 0.91124(14) 0.04982(7) 0.0506(5) Uani 1 1 d . . . 
F15 F -0.17435(9) 0.83501(14) 0.03820(7) 0.0568(5) Uani 1 1 d . . . 
F16 F -0.24351(9) 0.75250(14) 0.14369(8) 0.0560(5) Uani 1 1 d . . . 
F17 F -0.17499(9) 0.74606(14) 0.26087(8) 0.0566(5) Uani 1 1 d . . . 
F18 F -0.03880(9) 0.82359(14) 0.27324(7) 0.0544(5) Uani 1 1 d . . . 
  
loop_ 
 _atom_site_aniso_label 
 _atom_site_aniso_U_11 
 _atom_site_aniso_U_22 
 _atom_site_aniso_U_33 
 _atom_site_aniso_U_23 
 _atom_site_aniso_U_13 
 _atom_site_aniso_U_12 
Al1 0.0407(5) 0.0376(6) 0.0295(5) -0.0010(4) -0.0001(4) 0.0012(4) 
O1 0.0471(12) 0.0416(14) 0.0401(12) -0.0083(10) 0.0021(9) 0.0028(10) 
O2 0.0586(14) 0.0685(17) 0.0469(15) -0.0216(13) 0.0125(11) -0.0066(11) 
C1 0.0416(19) 0.0300(17) 0.0361(17) 0.0017(14) -0.0005(13) 0.0015(12) 
C2 0.0416(19) 0.0373(19) 0.0431(19) -0.0036(15) 0.0010(15) 0.0082(14) 
C3 0.045(2) 0.0366(19) 0.049(2) -0.0034(15) -0.0191(15) 0.0072(14) 
C4 0.065(2) 0.0303(19) 0.0316(18) -0.0033(14) -0.0104(16) 0.0025(15) 
C5 0.052(2) 0.0300(18) 0.0338(17) -0.0014(14) 0.0089(15) 0.0031(14) 
C6 0.0346(17) 0.0352(18) 0.0357(17) 0.0004(14) -0.0037(13) 0.0003(13) 
C7 0.0379(18) 0.0389(19) 0.0257(15) -0.0061(13) 0.0004(12) -0.0014(14) 
C8 0.0437(19) 0.046(2) 0.0313(17) -0.0073(15) 0.0040(13) 0.0025(16) 
C9 0.059(2) 0.037(2) 0.0342(18) -0.0050(15) 0.0081(15) -0.0111(17) 
C10 0.081(3) 0.029(2) 0.0293(17) -0.0019(14) 0.0005(16) 0.0001(18) 
C11 0.053(2) 0.039(2) 0.0352(18) -0.0069(15) -0.0083(14) 0.0078(17) 
C12 0.0400(19) 0.040(2) 0.0329(17) -0.0075(14) -0.0007(13) -0.0056(15) 
C13 0.0470(18) 0.0309(17) 0.0317(17) -0.0013(13) 0.0004(14) 0.0043(13) 
C14 0.0484(19) 0.0340(19) 0.0273(17) -0.0024(13) 0.0048(14) -0.0006(14) 
C15 0.0491(19) 0.0387(19) 0.0273(17) -0.0049(14) -0.0066(14) 0.0037(14) 
C16 0.0354(18) 0.0327(18) 0.048(2) -0.0045(14) -0.0036(14) -0.0003(13) 
C17 0.0464(19) 0.0340(19) 0.0354(18) 0.0087(14) 0.0041(15) 0.0005(14) 
C18 0.052(2) 0.0344(19) 0.0264(17) 0.0032(13) -0.0043(14) 0.0027(14) 
C19 0.0323(17) 0.048(2) 0.050(2) -0.0146(18) -0.0037(14) -0.0022(14) 
C20 0.093(3) 0.099(3) 0.041(2) 0.002(2) 0.0085(19) -0.021(2) 
C21 0.041(2) 0.038(2) 0.082(3) -0.002(2) -0.0086(18) -0.0046(14) 
C22 0.075(3) 0.050(3) 0.106(3) 0.029(2) -0.026(2) -0.0224(19) 
C23 0.060(2) 0.046(3) 0.171(5) -0.028(3) -0.008(3) 0.0005(18) 
F2 0.0434(11) 0.0663(13) 0.0634(12) -0.0197(10) -0.0046(9) 0.0087(8) 
F3 0.0595(13) 0.0661(13) 0.0823(14) -0.0245(10) -0.0338(10) 0.0177(9) 
F4 0.0921(14) 0.0586(13) 0.0396(11) -0.0107(9) -0.0222(9) 0.0031(10) 
F5 0.0696(12) 0.0545(12) 0.0418(10) -0.0106(9) 0.0084(9) -0.0016(9) 
F6 0.0424(10) 0.0637(12) 0.0518(11) -0.0127(9) -0.0024(8) 0.0056(8) 
F8 0.0433(11) 0.0545(12) 0.0598(11) -0.0044(9) 0.0083(8) -0.0024(8) 
F9 0.0778(13) 0.0527(12) 0.0624(12) -0.0011(10) 0.0186(10) -0.0195(10) 
F10 0.1101(16) 0.0362(12) 0.0546(12) 0.0046(9) 0.0028(10) 0.0016(10) 
F11 0.0712(14) 0.0460(12) 0.0757(13) -0.0033(10) -0.0192(10) 0.0154(9) 
F12 0.0438(11) 0.0475(11) 0.0646(11) -0.0021(9) -0.0022(8) -0.0007(8) 
F14 0.0644(11) 0.0612(12) 0.0263(9) -0.0011(8) 0.0044(8) -0.0085(9) 
F15 0.0640(11) 0.0695(13) 0.0369(10) -0.0057(9) -0.0142(8) -0.0064(9) 
F16 0.0433(11) 0.0572(12) 0.0676(12) 0.0015(9) -0.0058(8) -0.0077(9) 
F17 0.0589(12) 0.0610(12) 0.0498(11) 0.0190(9) 0.0048(8) -0.0079(9) 
F18 0.0672(12) 0.0617(13) 0.0343(10) 0.0160(8) -0.0112(8) -0.0134(9) 
  
_geom_special_details 
; 
 All esds (except the esd in the dihedral angle between two l.s. planes) 
 are estimated using the full covariance matrix.  The cell esds are taken 
 into account individually in the estimation of esds in distances, angles 
 and torsion angles; correlations between esds in cell parameters are only 
 used when they are defined by crystal symmetry.  An approximate (isotropic) 
 treatment of cell esds is used for estimating esds involving l.s. planes. 
; 
  
loop_ 
 _geom_bond_atom_site_label_1 
 _geom_bond_atom_site_label_2 
 _geom_bond_distance 
 _geom_bond_site_symmetry_2 
 _geom_bond_publ_flag 
Al1 O1 1.811(2) . ? 
Al1 C1 1.987(3) . ? 
Al1 C7 1.990(3) . ? 
Al1 C13 1.991(3) . ? 
O1 C19 1.255(3) . ? 
O2 C19 1.299(4) . ? 
O2 C20 1.446(4) . ? 
C1 C2 1.374(4) . ? 
C1 C6 1.385(4) . ? 
C2 F2 1.351(3) . ? 
C2 C3 1.387(4) . ? 
C3 F3 1.346(3) . ? 
C3 C4 1.360(4) . ? 
C4 F4 1.350(3) . ? 
C4 C5 1.365(4) . ? 
C5 F5 1.352(3) . ? 
C5 C6 1.364(4) . ? 
C6 F6 1.362(3) . ? 
C7 C12 1.374(4) . ? 
C7 C8 1.380(4) . ? 
C8 C9 1.373(4) . ? 
C8 F8 1.356(3) . ? 
C9 F9 1.346(3) . ? 
C9 C10 1.368(4) . ? 
C10 F10 1.348(3) . ? 
C10 C11 1.378(4) . ? 
C11 F11 1.344(3) . ? 
C11 C12 1.375(4) . ? 
C12 F12 1.365(3) . ? 
C13 C18 1.382(4) . ? 
C13 C14 1.386(4) . ? 
C14 F14 1.359(3) . ? 
C14 C15 1.367(4) . ? 
C15 F15 1.348(3) . ? 
C15 C16 1.375(4) . ? 
C16 F16 1.341(3) . ? 
C16 C17 1.370(4) . ? 
C17 F17 1.352(3) . ? 
C17 C18 1.368(4) . ? 
C18 F18 1.355(3) . ? 
C19 C21 1.450(5) . ? 
C21 C22 1.329(5) . ? 
C21 C23 1.483(5) . ? 
  
loop_ 
 _geom_angle_atom_site_label_1 
 _geom_angle_atom_site_label_2 
 _geom_angle_atom_site_label_3 
 _geom_angle 
 _geom_angle_site_symmetry_1 
 _geom_angle_site_symmetry_3 
 _geom_angle_publ_flag 
O1 Al1 C1 108.68(11) . . ? 
O1 Al1 C7 107.47(11) . . ? 
C1 Al1 C7 106.44(12) . . ? 
O1 Al1 C13 105.44(12) . . ? 
C1 Al1 C13 117.31(12) . . ? 
C7 Al1 C13 111.12(12) . . ? 
C19 O1 Al1 148.2(2) . . ? 
C19 O2 C20 118.1(3) . . ? 
C2 C1 C6 114.0(3) . . ? 
C2 C1 Al1 128.1(2) . . ? 
C6 C1 Al1 117.4(2) . . ? 
F2 C2 C1 120.2(3) . . ? 
F2 C2 C3 116.4(3) . . ? 
C1 C2 C3 123.4(3) . . ? 
F3 C3 C4 120.2(3) . . ? 
F3 C3 C2 120.7(3) . . ? 
C4 C3 C2 119.1(3) . . ? 
F4 C4 C3 119.6(3) . . ? 
F4 C4 C5 120.1(3) . . ? 
C3 C4 C5 120.3(3) . . ? 
F5 C5 C6 121.5(3) . . ? 
F5 C5 C4 119.9(3) . . ? 
C6 C5 C4 118.6(3) . . ? 
F6 C6 C5 117.2(2) . . ? 
F6 C6 C1 118.1(2) . . ? 
C5 C6 C1 124.6(3) . . ? 
C12 C7 C8 114.1(3) . . ? 
C12 C7 Al1 125.8(2) . . ? 
C8 C7 Al1 119.8(2) . . ? 
C9 C8 F8 116.4(3) . . ? 
C9 C8 C7 124.5(3) . . ? 
F8 C8 C7 119.1(3) . . ? 
F9 C9 C10 120.1(3) . . ? 
F9 C9 C8 121.5(3) . . ? 
C10 C9 C8 118.4(3) . . ? 
F10 C10 C9 120.5(3) . . ? 
F10 C10 C11 119.1(3) . . ? 
C9 C10 C11 120.4(3) . . ? 
F11 C11 C10 120.5(3) . . ? 
F11 C11 C12 121.2(3) . . ? 
C10 C11 C12 118.3(3) . . ? 
F12 C12 C7 119.7(3) . . ? 
F12 C12 C11 115.9(3) . . ? 
C7 C12 C11 124.4(3) . . ? 
C18 C13 C14 113.3(3) . . ? 
C18 C13 Al1 126.0(2) . . ? 
C14 C13 Al1 119.9(2) . . ? 
F14 C14 C15 117.2(2) . . ? 
F14 C14 C13 118.3(2) . . ? 
C15 C14 C13 124.5(3) . . ? 
F15 C15 C14 121.7(3) . . ? 
F15 C15 C16 119.0(3) . . ? 
C14 C15 C16 119.2(2) . . ? 
F16 C16 C15 120.5(3) . . ? 
F16 C16 C17 120.4(3) . . ? 
C15 C16 C17 119.1(3) . . ? 
F17 C17 C18 121.5(3) . . ? 
F17 C17 C16 119.1(3) . . ? 
C18 C17 C16 119.4(3) . . ? 
F18 C18 C17 116.9(2) . . ? 
F18 C18 C13 118.7(3) . . ? 
C17 C18 C13 124.5(3) . . ? 
O1 C19 O2 118.9(3) . . ? 
O1 C19 C21 125.6(3) . . ? 
O2 C19 C21 115.5(3) . . ? 
C22 C21 C19 117.3(3) . . ? 
C22 C21 C23 125.2(4) . . ? 
C19 C21 C23 117.5(4) . . ? 
  
_diffrn_measured_fraction_theta_max    0.996 
_diffrn_reflns_theta_full              23.33 
_diffrn_measured_fraction_theta_full   0.996 
_refine_diff_density_max    0.289 
_refine_diff_density_min   -0.224 
_refine_diff_density_rms    0.056 
  
  
